# Supplementary material for: Prognostic Significance of the PROFUND Index on One Year Mortality in Acute Heart Failure: Results from the RICA Registry
Source: MDPI journal article supplement (doi:10.3390/jcm11071876), 2022-03-28
Supplement: s1 [file s1]

Supplementary Table S1. Causes of death

| Cause of death                                                                   | Frequency | Percentage |
|----------------------------------------------------------------------------------|-----------|------------|
| Heart failure                                                                    | 510       | 35.9       |
| Other cause                                                                      | 202       | 1.2        |
| Refractory heart failure                                                         | 190       | 13.4       |
| Infection or sepsis                                                              | 182       | 12.8       |
| Sudden cardiac death (unexpected death in a natural way with no apparent cause). | 100       | 7.0        |
| Neoplasia                                                                        | 61        | 4.3        |
| Ictus                                                                            | 60        | 4.2        |
| Other vascular causes                                                            | 51        | 3.6        |
| Acute myocardial infarction                                                      | 36        | 2.5        |
| Death within 1 hour after symptom onset                                          | 15        | 1.1        |
| Pulmonary embolism                                                               | 7         | 0.5        |
| After cardiovascular surgery                                                     | 3         | 0.2        |
| Aortic aneurism                                                                  | 2         | 0.1        |

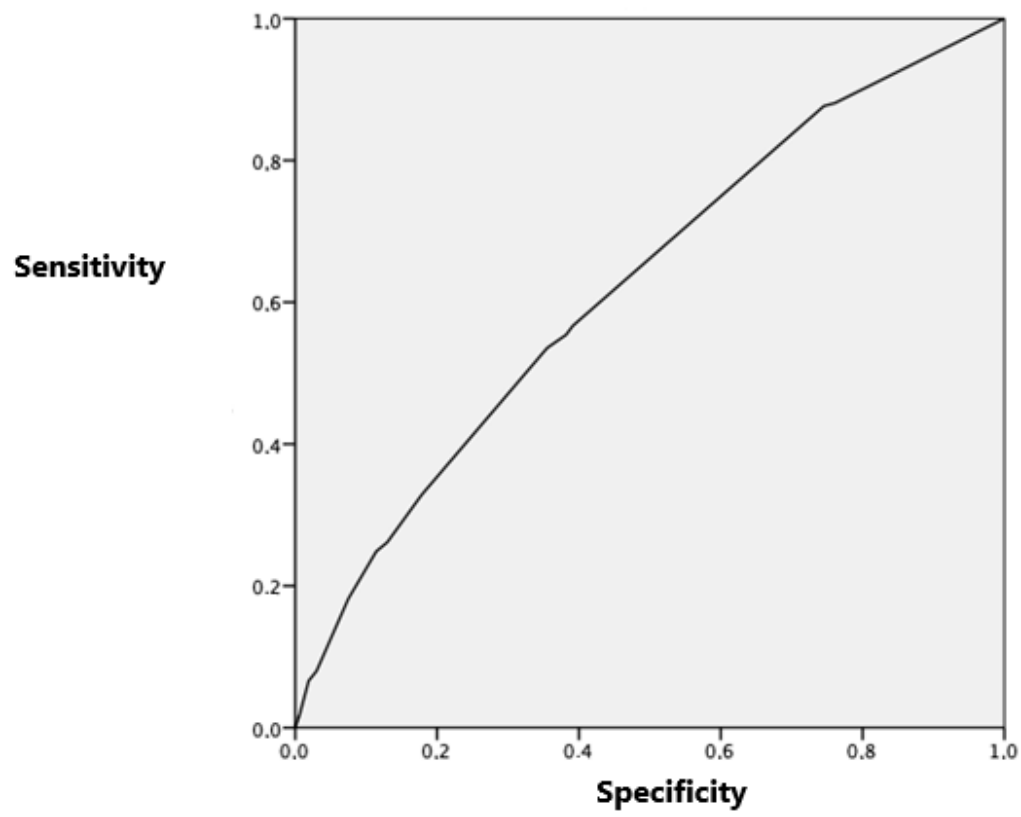

Figure S1. ROC curve of PROFUND Index.

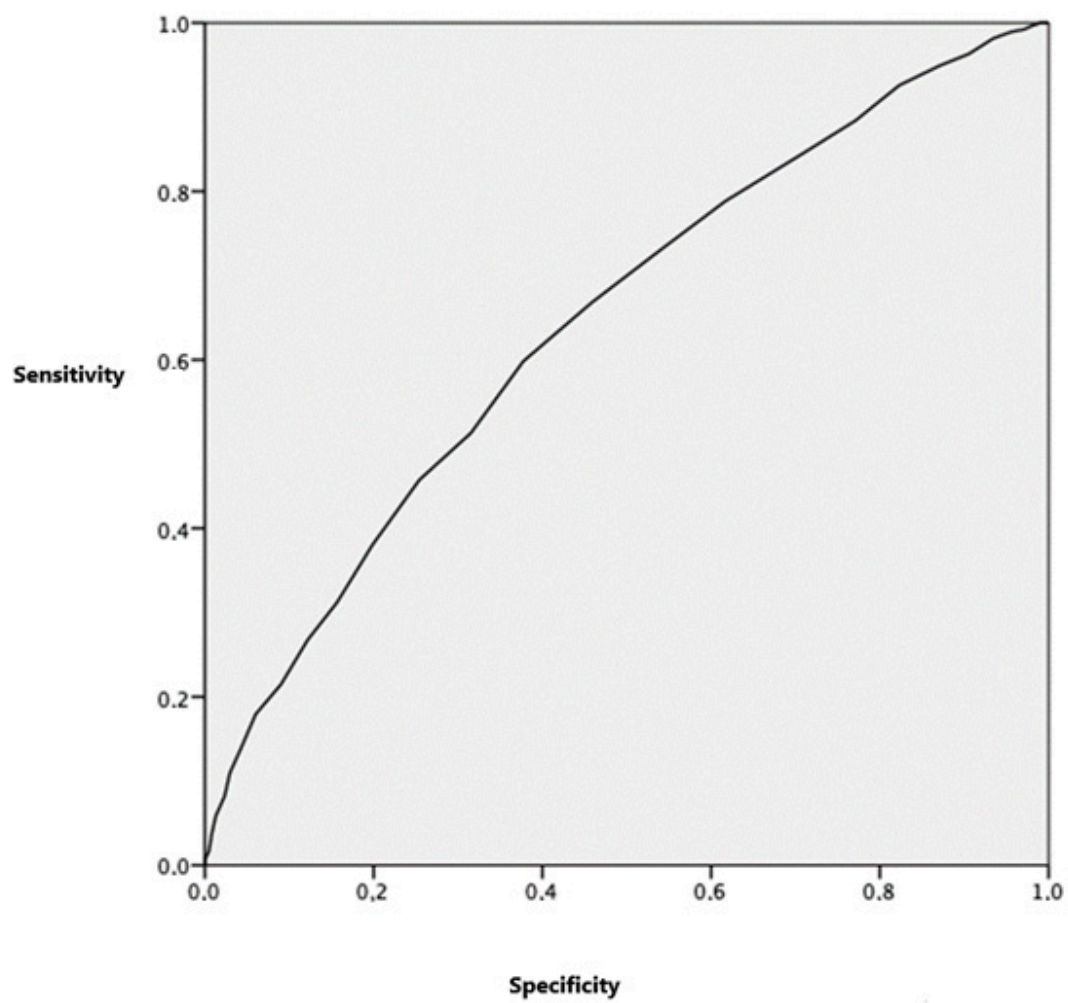

Figure S2. ROC MAGGIC CURVE
